# Supplementary material
Source: PubMed Central journal article supplement (PMC5808780)
Supplement: supp_RA117.000682_133518_1_supp_42561_p1b999.pdf [file supp_RA117.000682_133518_1_supp_42561_p1b999.pdf]

## **$\beta$ 1,4-Galactosyltransferase V activates Notch1 signaling in glioma stem-like cells and promotes their transdifferentiation into endothelial cells**

Chunhong Cui<sup>1#</sup>, Xiaoning Chen<sup>1#</sup>, Ying Liu<sup>1</sup>, Benjin Cao<sup>1</sup>, Yang Xing<sup>1</sup>, Chanjuan Liu<sup>1</sup>, Fan Yang<sup>1</sup>, Yinan Li<sup>1</sup>, Tianxiao Yang<sup>1</sup>, Lingyang Hua<sup>2</sup>, Mi Tian<sup>3</sup>, Yuanyan Wei<sup>1§</sup>, Ye Gong<sup>2,3§</sup>, Jianhai Jiang<sup>1§</sup>

<sup>1</sup>Key Laboratory of Glycoconjugates Research, Ministry of Public Health, Department of Biochemistry and Molecular Biology, Shanghai Medical College of Fudan University, Shanghai, People's Republic of China

<sup>2</sup>Department of Neurosurgery, Huashan Hospital, Fudan University, Shanghai, People's Republic of China

<sup>3</sup>Department of Critical Care Medicine, Huashan Hospital, Fudan University, Shanghai, People's Republic of China

<sup>#</sup>These authors contributed equally to this work.

### **<sup>§</sup>Corresponding Authors:**

Jianhai Jiang, PhD, Shanghai Medical College of Fudan University, Shanghai 200032, China. Tel: +86-21-54237660, Fax: +86-21-54237660, email: jianhaijiang@fudan.edu.cn.

Ye Gong, PhD, Huashan Hospital, Fudan University, Shanghai 200040, China, Tel: +86-21-52887218, Fax: +86-21-54237660, email: drgongye\_hs@126.com.

Yuanyan Wei, PhD, Shanghai Medical College of Fudan University, Shanghai 200032, China. Tel: +86-21-54237660, Fax: +86-21-54237660, email: yywei@fudan.edu.cn.

**Running title:**  $\beta$ 1, 4GalT V repression decreases glioma angiogenesis

### **Key words:**

$\beta$ 1,4GalT V; glioblastoma; glioma stem-like cell; endothelial cell; transdifferentiation; Notch1

## **TABLE OF CONTENTS**

### **1. SUPPLEMENTAL FIGURES**

**Figure S1.**  $\beta$ 1, 4GalT V depletion inhibits the transdifferentiation of glioma stem-like cells *in vitro*.

**Figure S2.** Reduction of  $\beta$ 1, 4GalT V expression inhibits gliomagenesis and transdifferentiation of glioma stem-like cells into endothelium *in vivo*.

Supplement Fig.1

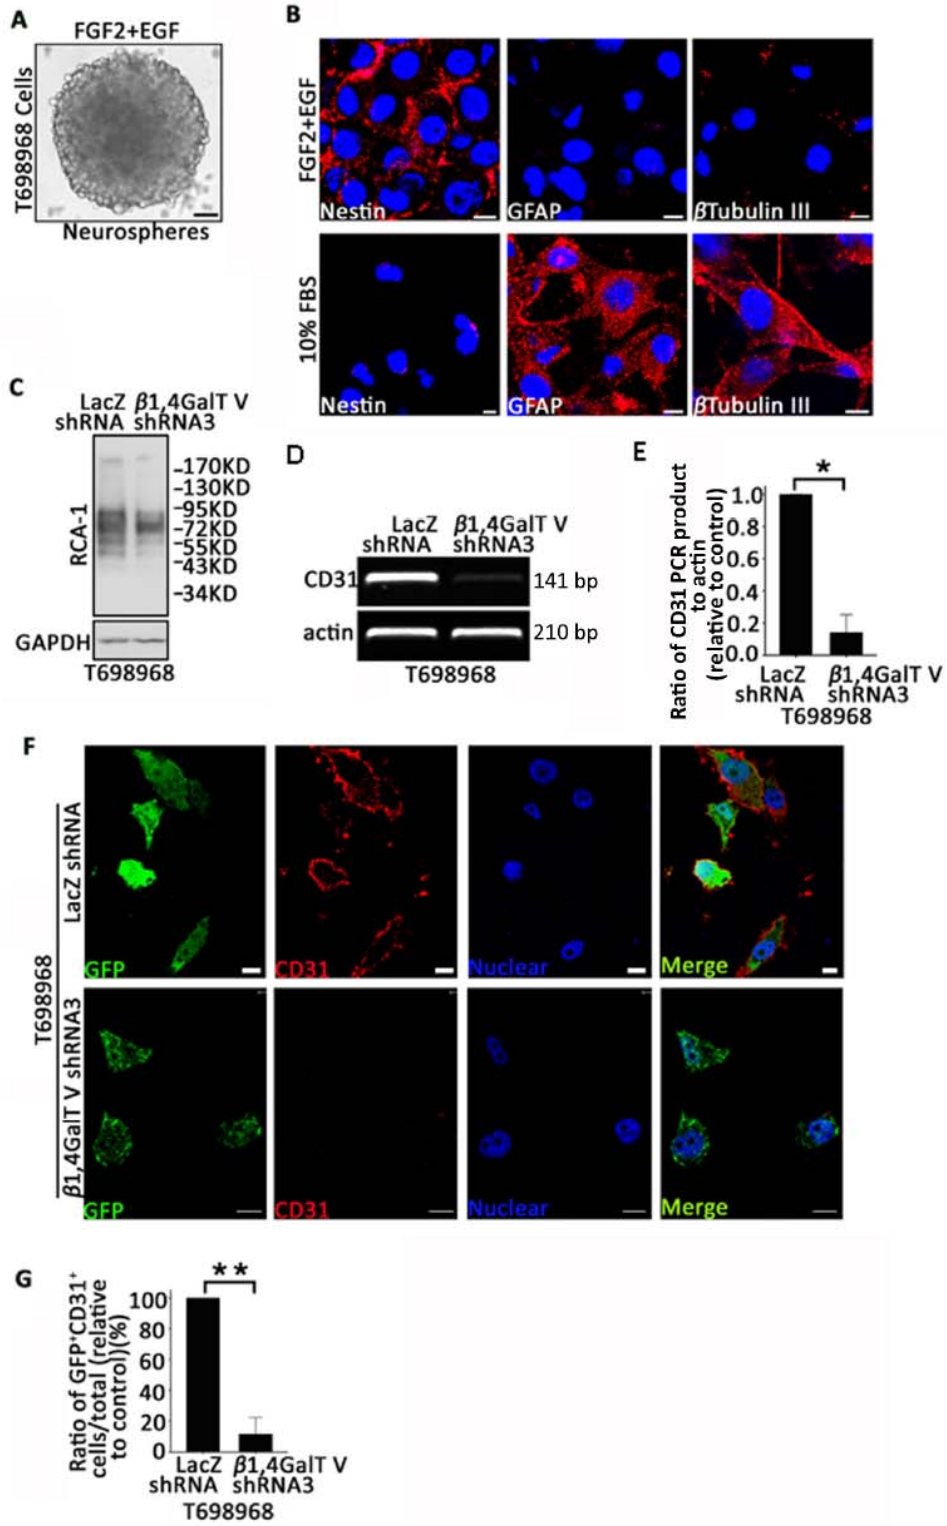

Figure S1.  $\beta$ 1, 4GalT V depletion inhibits the transdifferentiation of glioma stem-like

**cells *in vitro*.**

(A) Neurospheres formed by T698968 cells are shown. Scale bar, 20  $\mu\text{m}$ . (B) Immunostaining assay showed expression of Nestin, GFAP and  $\beta$ -tubulin III of T698968 cells cultured in serum-free medium or in medium containing 10% FBS. Scale bar, 10  $\mu\text{m}$ . (C) Proteins were separated by SDS-PAGE. The binding to RCA-1 lectin was analyzed by lectin blot in T698969 cells. GAPDH expression served as a loading control. (D) RT-PCR analysis showed that reduction of  $\beta$ 1,4GalT V expression suppressed the CD31 mRNA expression in T698968 cells. Actin expression served as loading control. (E) Relative densities of CD31 PCR product level in (D) were quantified using densitometry. Values are normalized to that of T698968 cells expressing LacZ shRNA. Results are expressed as Mean  $\pm$  SD (n = 3; \* $p$  < 0.05). (F) Immunofluorescence staining of human endothelial cells marker CD31 and GFP in T698968 cells expressing control- or  $\beta$ 1,4GalT VshRNA cultured in human endothelial SFM. Scale bar, 10  $\mu\text{m}$ . (G) The number of GFP<sup>+</sup>CD31<sup>+</sup> cells in (F) was quantified using cell counting. Values are normalized to that of T698968 cells expressing LacZ shRNA. Results are expressed as Mean  $\pm$  SEM (n = 3; \*\* $p$  < 0.01).

Supplement Fig.2

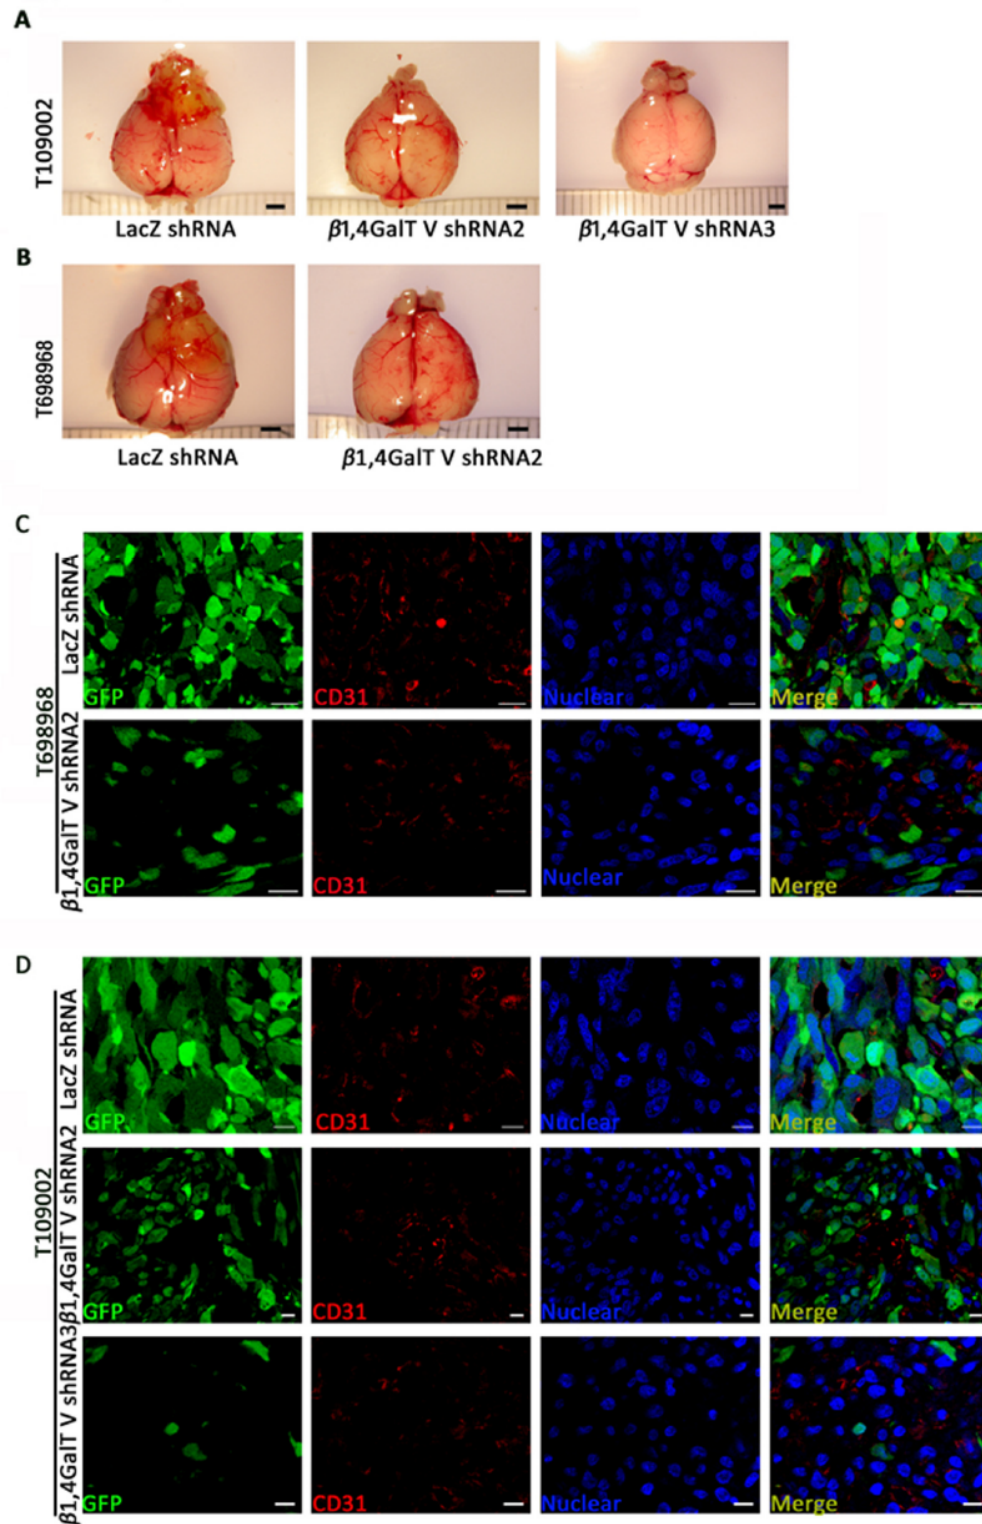

**Figure S2. Reduction of  $\beta$ 1, 4GalT V expression inhibits gliomagenesis and transdifferentiation of glioma stem-like cells into endothelium *in vivo*.**

(A-B) Nude mice were injected with T109002 (A) or T698968 (B) cells expressing control or  $\beta$ 1,4GalT V shRNA. Four weeks later, photos were taken for the xenograft. Scale bar, 2 mm.

(C-D) Confocal immunofluorescence analysis showed co-localization of human endothelial cell marker CD31 and tumor cell marker GFP in tumor xenograft formed by T698968 (C) and T109002 (D) cells expressing control or  $\beta$ 1,4GalT V shRNA. Scale bar, 10  $\mu$ M.
